# Supplementary material
Source: publisher figshare collection journal article supplement (https://tandf.figshare.com/ndownloader/files/14769542)
Supplement: Supplementary file 1 [file 14769542]

|  | **S segment 3' gRNA** | | | **S segment 5'gRNA** | | |
| --- | --- | --- | --- | --- | --- | --- |
| **universal primer** | **SATV primer** | **SHAV primer** | **universal primer** | **SATV primer** | **SHAV primer** |
| **Primer name** | For-S-univ | Rev-S-SATV | Rev-S-SHAV | Rev-S-univ | For-S-SATV | For-S-SHAV |
| **SATV binding** | AGTAGTGAGCTCCACTATTAAC ||||||||o||||||||||||| | CACTTGCTTCAGCCAACTTA |||||||||||||||||||| | TCTCGATAACCAGTGGGTAG  |o||||||||o||o||o||o | AGTAGTGTTCTCCACTTATTAACTATC ||||||||||||||||||||||||||| | TTAAGGCTGCGTTCAACTCC |||||||||||||||||||| | TTGATGCTTTTGACTTCTACCCA |||||||||||||o||o||o||o |
| **Primer sequence (5'-3')** | AGTAGTGAACTCCACTATTAAC | CACTTGCTTCAGCCAACTTA | TTTCGATAACTAGCGGATAA | AGTAGTGTTCTCCACTTATTAACTATC | TTAAGGCTGCGTTCAACTCC | TTGATGCTTTTGATTTTTATCCG |
| **SHAV binding** | |||||||||||||||||||||| AGTAGTGAACTCCACTATTAAC | ||||o||||||||o|oo||o CACTAGCTTCAGCTAGTTTG | |||||||||||||||||||| TTTCGATAACTAGCGGATAA | ||||||||||||||||||||||||||| AGTAGTGTTCTCCACTTATTAACTATC | |o||||||||o|||||o||o TAAAGGCTGCTTTCAATTCT | ||||||||||||||||||||||| TTGATGCTTTTGATTTTTATCCG |
| **position (amplicon length)** | 1→22 | 389→370 (389 bp) | 521→502 (521 bp) | 840→814 (SATV)/ 839→813 (SHAV) | 633→652 (207 bp) | 486→508 (353) |
|  | **M segment 3'gRNA** | | | **M segment 5'gRNA** | | |
| **universal primer** | **SATV primer** | **SHAV primer** | **universal primer** | **SATV primer** | **SHAV primer** |
| **Primer name** | For-M-univ | Rev-M-SATV | Rev-M-SHAV | Rev-M-univ | For-M-SATV | For-M-SHAV |
| **SATV binding** | AGTAGTGAACTACCACAAT |||||||||||||||||||||| | TATTTAGAACAAGGAAAGTACCC ooo|oooo|oo|oo|oooooooo | CCAGTAATAGAATAATGGTTGAG ||||||||||||||||||||||| | AGTAGTGTTCTACCA |||||||||||||||||||||| | TCTCTCTTCATCCTGATCTTGACTC ||||||||||||||||||||||||| | TTAGTGTAATATTCCAATCTCTAT oo|ooo||oooooooo||oooo|o |
| **Primer sequence (5'-3')** | AGTAGTAGTGAACTACCAMAAT | CGATATCTAATATCATGAAGGAG | CCAGTAATAGAATAATGGTTGAG | GAGTAGTAGTAGTGTTCTACCA | TCTCTCTTCATCCTGATCTTGACTC | GAATCATAGGGCCAATATGGAAAG |
| **SHAV binding** | ||||||||||||||||||| agtAGTAGTGAACTACCAAAAT | ||||||||||||||||||||||| CGATATCTAATATCATGAAGGAG | oo|oo|oooooooo||oo|oooo GTACCAGATATTCGATAATGATT | |||||||||||||||  AGTAGTGTTCTACCA | |oooooo|o||oo|o||oo|||ooo TTCTCTGTTATTTTAATAGTGAAAG | |||||||||||||||||||||||| GAATCATAGGGCCAATATGGAAAG |
| **position (amplicon length)** | 1→19 | 333→311 (333 bp) | 460→438 (460 bp) | 4365→4351 (SATV) / 4315→4301 (SHAV) | 4122→4146 (243 bp) | 4051→4074 (264 bp) |
|  | **L segment 3'gRNA** | | | **L segment 5'gRNA** | | |
| **universal primer** | **SATV primer** | **SHAV primer** | **universal primer** | **SATV primer** | **SHAV primer** |
| **Primer name** | For-L-univ | Rev-L-SATV | Rev-L-SHAV | Rev-L-univ | For-L-SATV | For-L-SHAV |
| **SATV binding** | AGTAGTGTACCCCTAATTAC aaa|||||||||||||||||||| | CCATATGTATGGTCTGTTGAG ||||||||||||||||||||| | CTTGACATGGATTGTATCTCTT  |||||||||o||o|||||||oo | AGTAGTGTGCCCCTAATTACATG ||||||||||||||||||||||| | ACATCTACCACAATTTCCAAATC ||||||||||||||||||||||| | TAACATGGATTTTGAATATGCTG |o||o|||||o||o||o|o|||o |
| **Primer sequence (5'-3')** | AGTAGTAGTGTACCCCTAATTAC | CCATATGTATGGTCTGTTGAG | CTTGACATGAATAGTATCTCGC | AGTAGTGTGCCCCTAATTACATG | ACATCTACCACAATTTCCAAATC | TGACTTGGATCTTAAACAAGCTA |
| **SHAV binding** | |||||||||||||||||||| aaaAGTAGTGTACCCCTAATTAC | |||||||o|||o||o|||||o CCATATGCATGATCAGTTGAT | |||||||||||||||||||||| CTTGACATGAATAGTATCTCGC | ||||||||||||||||||||||| AGTAGTGTGCCCCTAATTACATG | |o|||||o||o|||||o|||o|o ATATCTATCATAATTTTCAAGTT | ||||||||||||||||||||||| TGACTTGGATCTTAAACAAGCTA |
| **position (amplicon length)** | 1→20 | 326→306 (326 bp) | 444→423 (444 bp) | 6882→6860 | 6518→6540 (364 bp) | 6425→6447 (457 bp) |
